# Supplementary material for: Effects of nitrogen fertilization and bioenergy crop type on topsoil organic carbon and total Nitrogen contents in middle Tennessee USA
Source: PLoS One. 2020 Mar 30;15(3):e0230688. doi: 10.1371/journal.pone.0230688 (PMC7105129; doi:10.1371/journal.pone.0230688)
Supplement: S1 Data — (XLSX) [file pone.0230688.s002.xlsx]

## Sheet: SOCTN
ID	crop type	treatment	sampeid	SOC	TN	C/N
				%	%
1	SG	NN	1	1.69566	0.162708	10.4215
2	SG	NN	2	1.404	0.136209	10.3077
3	SG	NN	3	1.32504	0.129405	10.2395
4	SG	NN	4	1.53313	0.142786	10.7372
5	SG	NN	5	1.44449	0.137375	10.515
6	SG	NN	6	1.51633	0.142765	10.6212
7	SG	NN	7	2.25598	0.13809	16.337
8	SG	NN	8	1.61523	0.132852	12.1581
9	SG	NN	9	1.50577	0.126446	11.9083
10	SG	NN	10	1.62347	0.143076	11.3468
11	SG	NN	11	1.45236	0.136741	10.6212
12	SG	NN	12	1.51764	0.133656	11.3549
13	SG	NN	13	1.35347	0.12704	10.6539
14	SG	NN	14	1.20884	0.118178	10.2289
15	SG	NN	15	1.5593	0.153435	10.1626
16	SG	NN	16	1.2309	0.119578	10.2937
17	SG	NN	17	1.19551	0.115231	10.3749
18	SG	NN	18	1.47513	0.134337	10.9808
19	SG	NN	19	1.7031	0.16293	10.453
20	SG	NN	20	1.54844	0.154379	10.0301
21	SG	NN	21	1.5838	0.146696	10.7965
22	SG	NN	22	1.52558	0.140882	10.8288
23	SG	NN	23	1.15358	0.105609	10.9231
24	SG	NN	24	1.14442	0.106818	10.7137
25	SG	NN	1	1.06528	0.102544	10.3885
26	SG	NN	2	1.27102	0.1183	10.744
27	SG	NN	3	1.30728	0.119696	10.9217
28	SG	NN	4	1.0136	0.096484	10.5054
29	SG	NN	5	1.64362	0.148324	11.0813
30	SG	NN	6	2.03877	0.177098	11.5121
31	SG	NN	7	1.15767	0.102993	11.2403
32	SG	NN	8	1.55219	0.139142	11.1555
33	SG	NN	9	1.24384	0.111729	11.1327
34	SG	NN	10	1.4915	0.142204	10.4884
35	SG	NN	11	1.52896	0.139069	10.9942
36	SG	NN	12	1.65394	0.145429	11.3728
37	SG	NN	13	1.22583	0.110445	11.099
38	SG	NN	14	1.48589	0.13891	10.6968
39	SG	NN	15	1.83209	0.157533	11.6299
40	SG	NN	16	1.73872	0.150304	11.5681
41	SG	NN	17	1.14905	0.11008	10.4383
42	SG	NN	18	1.82573	0.163016	11.1997
43	SG	NN	19	1.16238	0.105649	11.0023
44	SG	NN	20	1.87703	0.15902	11.8037
45	SG	NN	21	1.55103	0.13598	11.4063
46	SG	NN	22	1.69502	0.136044	12.4593
47	SG	NN	23	1.37279	0.125929	10.9013
48	SG	NN	24	1.46289	0.127164	11.504
49	SG	LN	1	1.72575	0.154306	11.1839
50	SG	LN	2	1.86683	0.165516	11.2789
51	SG	LN	3	1.51814	0.125854	12.0627
52	SG	LN	4	1.54821	0.132235	11.708
53	SG	LN	5	1.32137	0.119409	11.066
54	SG	LN	6	1.22443	0.109843	11.1471
55	SG	LN	7	1.31063	0.112868	11.612
56	SG	LN	8	1.64286	0.146384	11.223
57	SG	LN	9	1.47443	0.13959	10.5626
58	SG	LN	10	1.29946	0.122411	10.6156
59	SG	LN	11	1.40677	0.144281	9.75015
60	SG	LN	12	1.47892	0.147936	9.997
61	SG	LN	13	1.38893	0.138131	10.0552
62	SG	LN	14	1.62055	0.155883	10.3959
63	SG	LN	15	1.64715	0.151175	10.8957
64	SG	LN	16	1.51791	0.14374	10.5601
65	SG	LN	17	1.20868	0.119389	10.1239
66	SG	LN	18	1.53409	0.128702	11.9197
67	SG	LN	19	1.5096	0.149876	10.0723
68	SG	LN	20	1.41352	0.13266	10.6552
69	SG	LN	21	1.27292	0.120238	10.5867
70	SG	LN	22	1.42747	0.134989	10.5747
71	SG	LN	23	1.61526	0.143458	11.2595
72	SG	LN	24	1.4169	0.130333	10.8714
73	SG	LN	1	1.65292	0.166356	9.93604
74	SG	LN	2	1.30328	0.131405	9.91806
75	SG	LN	3	1.67628	0.16285	10.2934
76	SG	LN	4	1.70123	0.154174	11.0344
77	SG	LN	5	1.76821	0.175262	10.089
78	SG	LN	6	1.95651	0.181702	10.7677
79	SG	LN	7	2.26171	0.208716	10.8363
80	SG	LN	8	1.42683	0.144887	9.84788
81	SG	LN	9	1.73761	0.164329	10.574
82	SG	LN	10	1.52914	0.151594	10.0871
83	SG	LN	11	1.65932	0.16147	10.2763
84	SG	LN	12	1.67243	0.157924	10.5901
85	SG	LN	13	1.74516	0.171049	10.2027
86	SG	LN	14	1.8888	0.172515	10.9486
87	SG	LN	15	1.60281	0.156025	10.2728
88	SG	LN	16	1.40143	0.140641	9.96462
89	SG	LN	17	1.7813	0.169868	10.4864
90	SG	LN	18	1.76216	0.168097	10.483
91	SG	LN	19	na	na	na
92	SG	LN	20	na	na	na
93	SG	LN	21	1.81755	0.178183	10.2004
94	SG	LN	22	1.37814	0.1376	10.0155
95	SG	LN	23	1.15645	0.117449	9.84639
96	SG	LN	24	1.40892	0.141771	9.93798
97	SG	HN	1	2.0944	0.17926	11.6836
98	SG	HN	2	2.07102	0.189274	10.9419
99	SG	HN	3	1.71266	0.170225	10.0612
100	SG	HN	4	1.7978	0.174311	10.3137
101	SG	HN	5	1.87786	0.182903	10.267
102	SG	HN	6	1.9053	0.177021	10.7631
103	SG	HN	7	1.88034	0.179913	10.4514
104	SG	HN	8	1.63387	0.166041	9.84014
105	SG	HN	9	1.7131	0.17219	9.94889
106	SG	HN	10	1.86067	0.175442	10.6056
107	SG	HN	11	1.30982	0.132059	9.91845
108	SG	HN	12	1.53687	0.150436	10.2161
109	SG	HN	13	1.73329	0.166102	10.4351
110	SG	HN	14	1.8482	0.170005	10.8715
111	SG	HN	15	1.83009	0.169052	10.8256
112	SG	HN	16	1.84543	0.171813	10.7409
113	SG	HN	17	1.81503	0.174043	10.4286
114	SG	HN	18	2.33128	0.197425	11.8085
115	SG	HN	19	1.5635	0.152647	10.2426
116	SG	HN	20	1.60644	0.152911	10.5057
117	SG	HN	21	1.76336	0.167189	10.5471
118	SG	HN	22	1.35117	0.140535	9.61448
119	SG	HN	23	1.24429	0.130801	9.51281
120	SG	HN	24	1.60657	0.157647	10.1909
121	SG	HN	1	1.61379	0.1608	10.036
122	SG	HN	2	1.60047	0.160938	9.94468
123	SG	HN	3	1.63791	0.168457	9.72296
124	SG	HN	4	1.99399	0.191294	10.4237
125	SG	HN	5	1.69495	0.166153	10.2012
126	SG	HN	6	1.63963	0.166588	9.84246
127	SG	HN	7	1.51329	0.156496	9.66983
128	SG	HN	8	1.63329	0.166525	9.80807
129	SG	HN	9	1.78576	0.173132	10.3144
130	SG	HN	10	1.69362	0.170173	9.95236
131	SG	HN	11	2.01466	0.188943	10.6628
132	SG	HN	12	2.29082	0.205915	11.1251
133	SG	HN	13	1.64246	0.170544	9.63072
134	SG	HN	14	1.5746	0.159543	9.86942
135	SG	HN	15	1.6484	0.160639	10.2615
136	SG	HN	16	1.73101	0.169259	10.227
137	SG	HN	17	1.48901	0.150264	9.90924
138	SG	HN	18	1.74177	0.173358	10.0472
139	SG	HN	19	1.75617	0.164166	10.6975
140	SG	HN	20	1.66875	0.173293	9.62966
141	SG	HN	21	1.7412	0.167497	10.3954
142	SG	HN	22	1.43037	0.146314	9.77598
143	SG	HN	23	1.35383	0.136113	9.94634
144	SG	HN	24	na	na	na
145	GG	NN	1	na	na	na
146	GG	NN	2	1.7804	0.172567	10.3172
147	GG	NN	3	1.84461	0.167567	11.0082
148	GG	NN	4	1.63879	0.160742	10.1952
149	GG	NN	5	1.50104	0.150022	10.0055
150	GG	NN	6	1.2946	0.138089	9.37515
151	GG	NN	7	1.30542	0.134513	9.70481
152	GG	NN	8	1.54744	0.161944	9.5554
153	GG	NN	9	1.6806	0.169531	9.9132
154	GG	NN	10	1.65901	0.170831	9.71146
155	GG	NN	11	1.35524	0.136734	9.91155
156	GG	NN	12	1.45225	0.154617	9.39257
157	GG	NN	13	1.41955	0.1477	9.61103
158	GG	NN	14	1.57502	0.163337	9.64281
159	GG	NN	15	1.6737	0.172128	9.72354
160	GG	NN	16	1.29472	0.140531	9.21306
161	GG	NN	17	1.38332	0.139138	9.94208
162	GG	NN	18	1.56767	0.164242	9.54486
163	GG	NN	19	1.59045	0.165377	9.61712
164	GG	NN	20	1.63259	0.166529	9.80364
165	GG	NN	21	1.65017	0.169309	9.7465
166	GG	NN	22	1.55781	0.152788	10.1959
167	GG	NN	23	1.48232	0.141041	10.5098
168	GG	NN	24	1.69809	0.161013	10.5463
169	GG	NN	1	2.62727	0.234273	11.2146
170	GG	NN	2	2.01474	0.203013	9.92418
171	GG	NN	3	1.5757	0.161037	9.78468
172	GG	NN	4	1.79931	0.184979	9.72711
173	GG	NN	5	1.3741	0.150304	9.14217
174	GG	NN	6	1.72836	0.1684	10.2634
175	GG	NN	7	1.79909	0.170011	10.5822
176	GG	NN	8	1.73108	0.171371	10.1013
177	GG	NN	9	1.96061	0.159811	12.2683
178	GG	NN	10	1.80459	0.173106	10.4248
179	GG	NN	11	1.70848	0.168096	10.1637
180	GG	NN	12	1.81281	0.171031	10.5993
181	GG	NN	13	na	na	na
182	GG	NN	14	1.4243	0.143954	9.89413
183	GG	NN	15	1.59594	0.156384	10.2053
184	GG	NN	16	1.75157	0.172731	10.1405
185	GG	NN	17	1.76963	0.168289	10.5155
186	GG	NN	18	1.71508	0.167261	10.2539
187	GG	NN	19	1.59988	0.15546	10.2912
188	GG	NN	20	2.17299	0.198179	10.9648
189	GG	NN	21	1.81262	0.176415	10.2748
190	GG	NN	22	1.6665	0.161018	10.3498
191	GG	NN	23	1.63187	0.157527	10.3593
192	GG	NN	24	1.52008	0.150485	10.1012
193	GG	LN	1	1.49964	0.149716	10.0166
194	GG	LN	2	1.78731	0.166585	10.7291
195	GG	LN	3	1.80527	0.150095	12.0276
196	GG	LN	4	1.52274	0.152647	9.97555
197	GG	LN	5	1.37612	0.135071	10.1881
198	GG	LN	6	1.62766	0.149315	10.9009
199	GG	LN	7	1.59669	0.143094	11.1584
200	GG	LN	8	1.55749	0.138592	11.238
201	GG	LN	9	1.56433	0.137338	11.3904
202	GG	LN	10	1.45254	0.125531	11.5712
203	GG	LN	11	1.50323	0.135271	11.1128
204	GG	LN	12	1.62348	0.148595	10.9256
205	GG	LN	13	1.58588	0.136687	11.6023
206	GG	LN	14	1.51527	0.148221	10.223
207	GG	LN	15	1.34171	0.128647	10.4294
208	GG	LN	16	1.40589	0.131905	10.6584
209	GG	LN	17	1.10804	0.085336	12.9845
210	GG	LN	18	1.67025	0.157409	10.6108
211	GG	LN	19	1.64168	0.152988	10.7308
212	GG	LN	20	1.21589	0.124236	9.78698
213	GG	LN	21	1.56488	0.150999	10.3635
214	GG	LN	22	1.69723	0.155127	10.941
215	GG	LN	23	1.44372	0.142374	10.1403
216	GG	LN	24	1.5	0.141531	10.5984
217	GG	LN	1	1.61733	0.159759	10.1235
218	GG	LN	2	1.52209	0.155952	9.76001
219	GG	LN	3	1.45695	0.151052	9.64537
220	GG	LN	4	1.59311	0.154726	10.2964
221	GG	LN	5	1.5593	0.158605	9.83136
222	GG	LN	6	1.58607	0.156938	10.1063
223	GG	LN	7	2.10693	0.188975	11.1492
224	GG	LN	8	1.65279	0.167183	9.88607
225	GG	LN	9	1.62013	0.153267	10.5706
226	GG	LN	10	1.69354	0.164572	10.2906
227	GG	LN	11	1.95103	0.180457	10.8116
228	GG	LN	12	1.90927	0.178524	10.6947
229	GG	LN	13	1.71113	0.164358	10.411
230	GG	LN	14	2.05734	0.194925	10.5545
231	GG	LN	15	1.94145	0.173375	11.198
232	GG	LN	16	1.79437	0.169433	10.5904
233	GG	LN	17	1.65275	0.163123	10.1319
234	GG	LN	18	1.78207	0.174191	10.2305
235	GG	LN	19	1.76519	0.174943	10.0901
236	GG	LN	20	1.91387	0.179488	10.663
237	GG	LN	21	2.29479	0.211267	10.862
238	GG	LN	22	2.0973	0.194106	10.805
239	GG	LN	23	1.7574	0.175001	10.0423
240	GG	LN	24	2.06412	0.189102	10.9154
241	GG	HN	1	1.62324	0.162165	10.0099
242	GG	HN	2	1.76708	0.17453	10.1248
243	GG	HN	3	1.52745	0.156532	9.75804
244	GG	HN	4	2.13948	0.201975	10.5928
245	GG	HN	5	1.74319	0.176646	9.86827
246	GG	HN	6	1.72565	0.171621	10.055
247	GG	HN	7	1.66423	0.164213	10.1346
248	GG	HN	8	2.00432	0.188027	10.6598
249	GG	HN	9	1.62083	0.156981	10.325
250	GG	HN	10	na	na	na
251	GG	HN	11	na	na	na
252	GG	HN	12	2.84355	0.229091	12.4123
253	GG	HN	13	2.03475	0.191342	10.6341
254	GG	HN	14	1.70397	0.170409	9.9993
255	GG	HN	15	1.91881	0.181938	10.5465
256	GG	HN	16	1.92117	0.191138	10.0512
257	GG	HN	17	1.88669	0.177602	10.6231
258	GG	HN	18	2.45944	0.209688	11.729
259	GG	HN	19	2.11988	0.19244	11.0158
260	GG	HN	20	2.09471	0.183504	11.4151
261	GG	HN	21	1.96942	0.192754	10.2173
262	GG	HN	22	2.15787	0.208935	10.3279
263	GG	HN	23	1.8722	0.17697	10.5792
264	GG	HN	24	2.28348	0.217827	10.483
265	GG	HN	1	1.77808	0.170864	10.4064
266	GG	HN	2	1.84126	0.175541	10.4891
267	GG	HN	3	1.9706	0.187135	10.5304
268	GG	HN	4	1.77357	0.168241	10.5418
269	GG	HN	5	1.60274	0.158423	10.1169
270	GG	HN	6	1.50693	0.15203	9.91206
271	GG	HN	7	1.54822	0.153592	10.0801
272	GG	HN	8	1.85877	0.184562	10.0712
273	GG	HN	9	1.87945	0.175131	10.7317
274	GG	HN	10	1.95771	0.190123	10.2971
275	GG	HN	11	1.96888	0.193524	10.1738
276	GG	HN	12	1.80897	0.181095	9.98908
277	GG	HN	13	1.81631	0.181838	9.98859
278	GG	HN	14	2.06984	0.194078	10.665
279	GG	HN	15	1.86059	0.179314	10.3761
280	GG	HN	16	1.51406	0.154876	9.77596
281	GG	HN	17	1.95783	0.187828	10.4235
282	GG	HN	18	1.78396	0.166116	10.7393
283	GG	HN	22	1.48526	0.148324	10.0136
284	GG	HN	23	1.83777	0.177223	10.3698
285	GG	HN	24	1.95038	0.185169	10.533
286	GG	HN	25	1.70756	0.196042	8.71017
287	GG	HN	26	1.75597	0.170702	10.2868
288	GG	HN	27	2.25651	0.199924	11.2868

## Sheet: plant aboveground biomass
crop	year	treatment	replicate	biomass, Mg/ha
GG	2014	NN	I	15.1449
GG	2014	NN	II	7.21417
GG	2014	NN	III	5.43924
GG	2014	NN	IV	9.51332
GG	2014	LN	I	13.7435
GG	2014	LN	II	12.9178
GG	2014	LN	III	12.0472
GG	2014	LN	IV	9.48032
GG	2014	HN	I	21.4553
GG	2014	HN	II	11.2017
GG	2014	HN	III	8.92124
GG	2014	HN	IV	8.66074
SG	2014	NN	I	18.6941
SG	2014	NN	II	16.3938
SG	2014	NN	III	7.53966
SG	2014	NN	IV	12.4638
SG	2014	LN	I	27.2777
SG	2014	LN	II	11.5127
SG	2014	LN	III	19.6678
SG	2014	LN	IV	9.88183
SG	2014	HN	I	22.8755
SG	2014	HN	II	14.4907
SG	2014	HN	III	9.97321
SG	2014	HN	IV	10.6233
GG	2015	NN	I	12.2923
GG	2015	NN	II	10.9222
GG	2015	NN	III	8.972
GG	2015	NN	IV	9.03978
GG	2015	LN	I	22.3961
GG	2015	LN	II	18.7479
GG	2015	LN	III	7.8211
GG	2015	LN	IV	13.7544
GG	2015	HN	I	21.4849
GG	2015	HN	II	15.94
GG	2015	HN	III	15.2718
GG	2015	HN	IV	13.579
SG	2015	NN	I	16.9156
SG	2015	NN	II	21.3582
SG	2015	NN	III	13.5902
SG	2015	NN	IV	17.288
SG	2015	LN	I	30.5361
SG	2015	LN	II	10.4502
SG	2015	LN	III	15.9092
SG	2015	LN	IV	18.9652
SG	2015	HN	I	22.2177
SG	2015	HN	II	15.8691
SG	2015	HN	III	21.3524
SG	2015	HN	IV	19.8131

## Sheet: Root DOM
Sample Type	Replicate	Spectral slope ratio (SR) of 275–295 nm over 350–400 nm	E2:E3	Fluorescence Index	Peak ratio (C:T)	Humification Index	C1% (three model; tyrosine-like)	C2% (three model; tryptophan-like)	C3% (three model;humic-like)
GG	1	0.570352	5.91176	1.81347	0.0859652	0.0593442	47.9157	46.3736	5.71069
GG	2	0.522043	4.10067	1.71403	0.0885397	0.0535985	40.9041	54.6542	4.44166
GG	3	1.06378	6.50617	1.7641	0.0674716	0.0569672	55.1243	38.9277	5.94801
GG	4	0.549898	5.27451	1.73033	0.40635	0.367409	51.1508	29.0214	19.8278
GG	5	0.410043	5.64865	1.90973	0.22548	0.277625	58.7236	25.955	15.3215
GG	6	0.653364	8.21622	1.68327	0.234402	0.217169	56.3878	30.5063	13.1059
GG	7	0.517033	4.07362	1.86601	0.143202	0.1886	65.9866	23.8554	10.1579
SG	1	1.57883	6.04505	1.73464	0.0510765	0.064886	62.2075	33.201	4.59153
SG	2	0.926572	6.11667	1.95071	0.105476	0.113972	61.6956	28.6626	9.64183
SG	3	0.907329	5.94393	1.86636	0.0723832	0.134233	71.6879	19.946	8.36608
SG	4	0.498916	6.5625	2.26101	0.141592	0.223028	66.8327	21.7071	11.4602
SG	5	1.30355	6.22917	1.97362	0.101945	0.137756	65.7226	25.6748	8.60257
SG	6	0.979947	6.59459	2.29658	0.2119	0.330602	66.4082	18.1794	15.4124
SG	7	0.866996	5.86885	1.97116	0.10784	0.162636	69.3944	20.784	9.8216
